# Supplementary material for: Ursolic acid inhibits colistin efflux and curtails colistin resistant Enterobacteriaceae
Source: PubMed Central journal article supplement (PMC6379497; doi:10.1186/s13568-019-0750-4), 2019-02-18

AMB Express

**Ursolic acid inhibits colistin efflux and curtails colistin resistant *Enterobacteriaceae***

Niranjana Sri Sundaramoorthy<sup>1</sup>, Harihar M. Mohan<sup>2</sup>, Shankar Subramaniam<sup>3</sup>, Thiagarajan Raman<sup>4</sup>, Subramaniapillai Selva Ganesan<sup>3</sup>, Aravind Sivasubamian<sup>3</sup> and Saisubramanian Nagarajan<sup>1\*</sup>

<sup>1</sup>Center for Research on Infectious Diseases, SCBT, SASTRA deemed University, Thanjavur, Tamil Nadu, India

<sup>2</sup> Department of Microbiology and Immunology, University of Michigan Medical School, Ann Arbor, MI 48109, USA

<sup>3</sup>School of Chemical and Biotechnology, SASTRA deemed University, Thanjavur, Tamil Nadu, India

<sup>4</sup>Advanced Zoology and Biotechnology Department, Ramakrishna Mission Vivekananda College, Chennai, Tamil Nadu, Thanjavur

**\*Correspondence:**

Dr.SaisubramanianNagarajan

[sai@scbt.sastra.edu](mailto:sai@scbt.sastra.edu)

Niranjana Sri Sundaramoorthy – niran31sri@gmail.com

Harihar M. Mohan – hari9mm@gmail.com

Shankar Subramaniam – shanksu88@gmail.com

Thiagarajan Raman – thiagi200@yahoo.co.in

Subramaniapillai Selva Ganesan – selva@biotech.sastra.edu

Aravind Sivasubamian - arvi@biotech.sastra.edu

**Table S1: Antimicrobial profiling of *Klebsiella pneumoniae* and *Escherichia coli* clinical isolates**

| Minimum Inhibitory Concentration (µg/ml) |             |              |              |             |             |              |             |            |             |                         |                         |
|------------------------------------------|-------------|--------------|--------------|-------------|-------------|--------------|-------------|------------|-------------|-------------------------|-------------------------|
| Antibiotic/<br>Compound                  | MTC<br>C KP | KP<br>BC1994 | KP<br>BC2412 | KP<br>U3866 | KP<br>U2016 | KP<br>BC1415 | KP<br>U2192 | KP<br>E474 | KP<br>BC936 | <i>E. coli</i><br>U3176 | <i>E. coli</i><br>U3790 |
| <b>Ceftriaxone</b>                       | <1          | >128         | >128         | >128        | >128        | >128         | >128        | >128       | >128        | >128                    | >128                    |
| <b>Meropenem</b>                         | 0.5         | >32          | >32          | >32         | 32          | 16           | >128        | 16         | 16          | >32                     | >32                     |
| <b>Ciprofloxacin</b>                     | 4           | 32           | 16           | 128         | 16          | 16           | 32          | 32         | 16          | 64                      | 256                     |
| <b>Levofloxacin</b>                      | 1           | 8            | 16           | 64          | 32          | 32           | 64          | 32         | 32          | 32                      | 32                      |
| <b>Norfloxacin</b>                       | <2          | 64           | 16           | 128         | 64          | >128         | 64          | 128        | 64          | >128                    | >128                    |
| <b>Amikacin</b>                          | <2          | 4            | 16           | >128        | >128        | >128         | >128        | >128       | >128        | >128                    | 8                       |
| <b>Gentamicin</b>                        | <4          | 256          | <4           | >256        | >128        | >128         | >128        | >128       | >128        | >256                    | 256                     |
| <b>Tobramycin</b>                        | 16          | 64           | 64           | >256        | >128        | >128         | >128        | >128       | >128        | >256                    | 128                     |
| <b>Erythromycin</b>                      | 64          | 256          | 64           | 256         | >128        | >128         | >128        | >128       | >128        | >256                    | 256                     |
| <b>Tetracycline</b>                      | >128        | <2           | 4            | 16          | 8           | >128         | >128        | >128       | >128        | <2                      | 128                     |
| <b>Tigecycline</b>                       | >128        | >128         | >128         | >128        | >128        | >128         | >128        | >128       | >128        | >128                    | >128                    |
| <b>Colistin</b>                          | 2           | 2            | 1            | 1           | 8           | 8            | 8           | <2         | 32          | 1                       | 32                      |
| <b>Rifampicin</b>                        | 4           | 64           | 32           | >128        | >128        | >128         | >128        | >128       | >128        | 4                       | 16                      |
| <b>Streptomycin</b>                      | 64          | 128          | 32           | 4           | 32          | 32           | 32          | 32         | 32          | 32                      | 16                      |
| <b>Kanamycin</b>                         | >256        | >256         | >256         | >256        | >128        | >128         | >128        | >128       | >128        | >256                    | >256                    |

**Table S2: MIC of plant metabolites against XDR strains of *Klebsiella pneumoniae* and *Escherichia coli***

| <b>Compounds</b>                       | <b>Minimum Inhibitory Concentration (µg/ml)</b> |                             |
|----------------------------------------|-------------------------------------------------|-----------------------------|
|                                        | <b><i>K. pneumoniae</i> BC936</b>               | <b><i>E. coli</i> U3790</b> |
| <b>Arjunolic Acid (AJ)</b>             | 128                                             | 256                         |
| <b>Acetyl Shikonin (AS)</b>            | 512                                             | 256                         |
| <b>B-Dimethyl acetyl shikonin (BD)</b> | 512                                             | 256                         |
| <b>Caffeic Acid (CA)</b>               | 128                                             | 512                         |
| <b>Chrysin (CH)</b>                    | 512                                             | 1024                        |
| <b>Crysophenol (CR)</b>                | 512                                             | 512                         |
| <b>Emoidin (EM)</b>                    | 512                                             | 512                         |
| <b>Naringenin (NIN)</b>                | 512                                             | 256                         |
| <b>Naringin (NG)</b>                   | 64                                              | 256                         |
| <b>Physicion (PH)</b>                  | 512                                             | 512                         |
| <b>Ursolic acid (UR)</b>               | 512                                             | 256                         |
| <b>Ventilone A (VA)</b>                | 512                                             | 256                         |
| <b>Ventiloquinone (VQ)</b>             | 512                                             | 512                         |

**Fig S1: Membrane permeability of colistin resistant *Escherichia coli* and *Klebsiella pneumoniae* is enhanced by ursolic acid treatment.** Mid-log cells of *E.coli* U3790 and *K. pneumoniae* BC936 were treated with either colistin (Col) or ursolic acid (UR) or in combination (Col+UR) along with fluorescent dye N-Phenyl 1-Naphthylamine (NPN) and fluorescence intensity was measured using a spectrofluorimeter. NPN uptake factor was calculated as the ratio of background subtracted fluorescence of different groups to that of buffer.

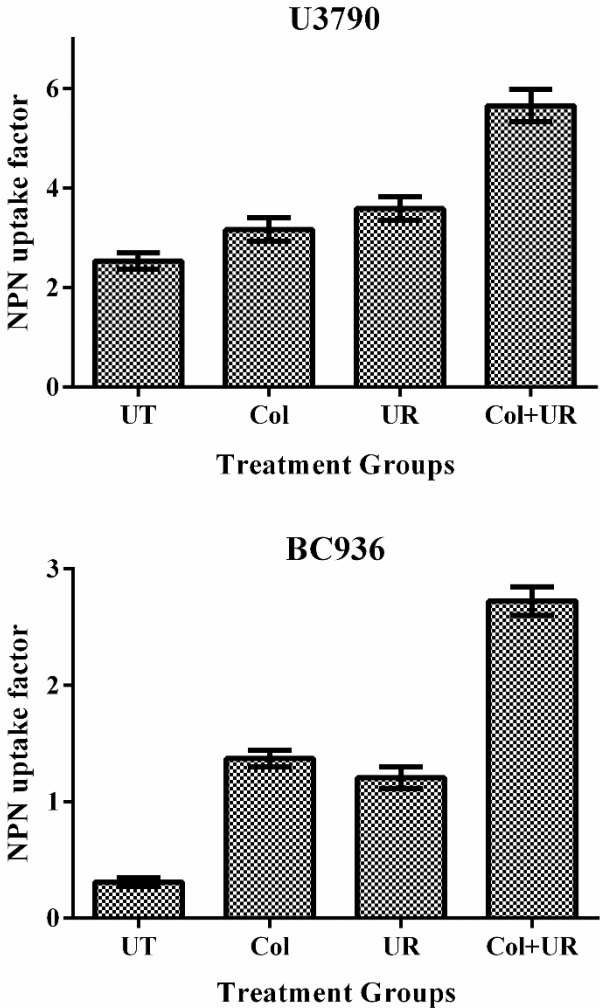

**Fig S2: Ursolic acid reduced ROS generation by colistin.** Mid-log cells of *E. coli* U3790 and *K. pneumoniae* BC936 were challenged with treatments comprising colistin (Col), ursolic acid (UR) and colistin+ ursolic acid (Col+UR). H<sub>2</sub>O<sub>2</sub> was used as a positive control in the assay. DCFH-DA was used as fluorophore to detect the amount of ROS generated in each of the treatments. The fluorescence intensity was quantified in a spectrofluorimeter.

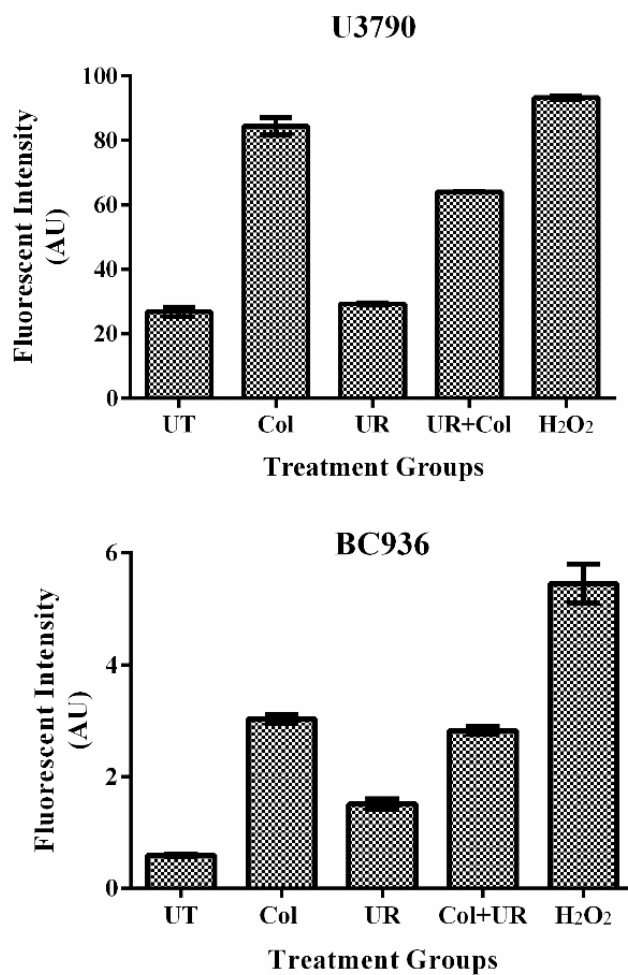

Supplement: 13568_2019_750_MOESM1_ESM.pdf [file 13568_2019_750_MOESM1_ESM.pdf]
